# Supplementary material for: Clinical codes combined with procedure codes increase diagnostic accuracy of Crohn’s disease in a US military health record
Source: PubMed Central journal article supplement — BMJ Open Gastroenterol. 2020 Feb 26;7(1):e000378. doi: 10.1136/bmjgast-2020-000378 (PMC7254129; doi:10.1136/bmjgast-2020-000378), 2020-02-26
Supplement: bmjgast-2020-000378supp001.pdf [file bmjgast-2020-000378supp001.pdf]

SUPPLEMENTARY TABLE 1

Singla M, et al. BMJ Open Gastro 2020;7:e000378. doi:10.1136/bmjgast-2020-000378

| Diagnoses on 284 Chart Reviewed Cases with 2 ICD-9 codes for Crohn's disease (CD)       | N (%)      |
|-----------------------------------------------------------------------------------------|------------|
| Confirmed Crohn's disease (CD)                                                          | 196 (69.0) |
| CD noted in records but missing pathology or endoscopic records for confirmation        | 9 (3.2)    |
| Complications found in CD but no evidence to confirm CD                                 | 10 (3.5)   |
| Recurrent anal fissures of fistulas with no mucosal disease                             | 3          |
| Mucosal thickening on computerized tomography (CT) scan                                 | 5          |
| Intra-abdominal abscess                                                                 | 1          |
| Cryptitis                                                                               | 1          |
| Other chronic inflammatory bowel diseases                                               | 17 (6.0)   |
| Radiographic ileitis without confirmation of endoscopic inflammation                    | 4          |
| Indeterminate colitis                                                                   | 4          |
| Ulcerative colitis                                                                      | 3          |
| Possible ulcerative colitis                                                             | 1          |
| Lymphocytic colitis                                                                     | 5          |
| Other intestinal inflammatory conditions                                                | 7 (2.5)    |
| Jejunal enteritis (without pathology to confirm CD)                                     | 1          |
| Acute colitis followed by normal colonoscopy                                            | 2          |
| Eosinophilic gastrointestinal disease                                                   | 3          |
| Behcet's disease                                                                        | 1          |
| Other gastrointestinal diagnoses or conditions (not necessarily exclusive of the above) | 24 (8.4)   |
| Irritable bowel syndrome (IBS)                                                          | 16         |
| Carcinoid tumor                                                                         | 1          |
| Appendicitis                                                                            | 1          |
| Traveller's diarrhoea                                                                   | 1          |
| Small bowel obstruction                                                                 | 1          |
| Gastro-oesophageal reflux disorder                                                      | 1          |
| Dyspepsia                                                                               | 1          |
| Chronic abdominal pain                                                                  | 1          |
| Internal haemorrhoids with bleeding                                                     | 1          |
| Hidradenitis Suppurativa (increased in CD)                                              | 1 (.04)    |
| No records of GI or immune-mediated diseases                                            | 20 (7.0)   |
